# Supplementary material
Source: HighWire-hosted journal article supplement (https://www.cmajopen.ca/highwire/filestream/81289/field_highwire_adjunct_files/1/2019-0154-2-at.pdf)

**Appendix 2 (as supplied by the authors): Supplemental figures**

Supplemental Figure S1. Crude relative risk (green dots) of an emergency department visit in the first trimester of pregnancy, associated with maternal age (< 25, 25-34 [ref], ≥ 35 years); parity (parous [ref] or nulliparous); income quintile (1, 2, 3, 4, or 5 [ref]); residence (urban [ref] or rural); immigrant status (Canadian-born\* [ref] or foreign-born); care provider (obstetrician [ref], family physician†, other, none/unknown).

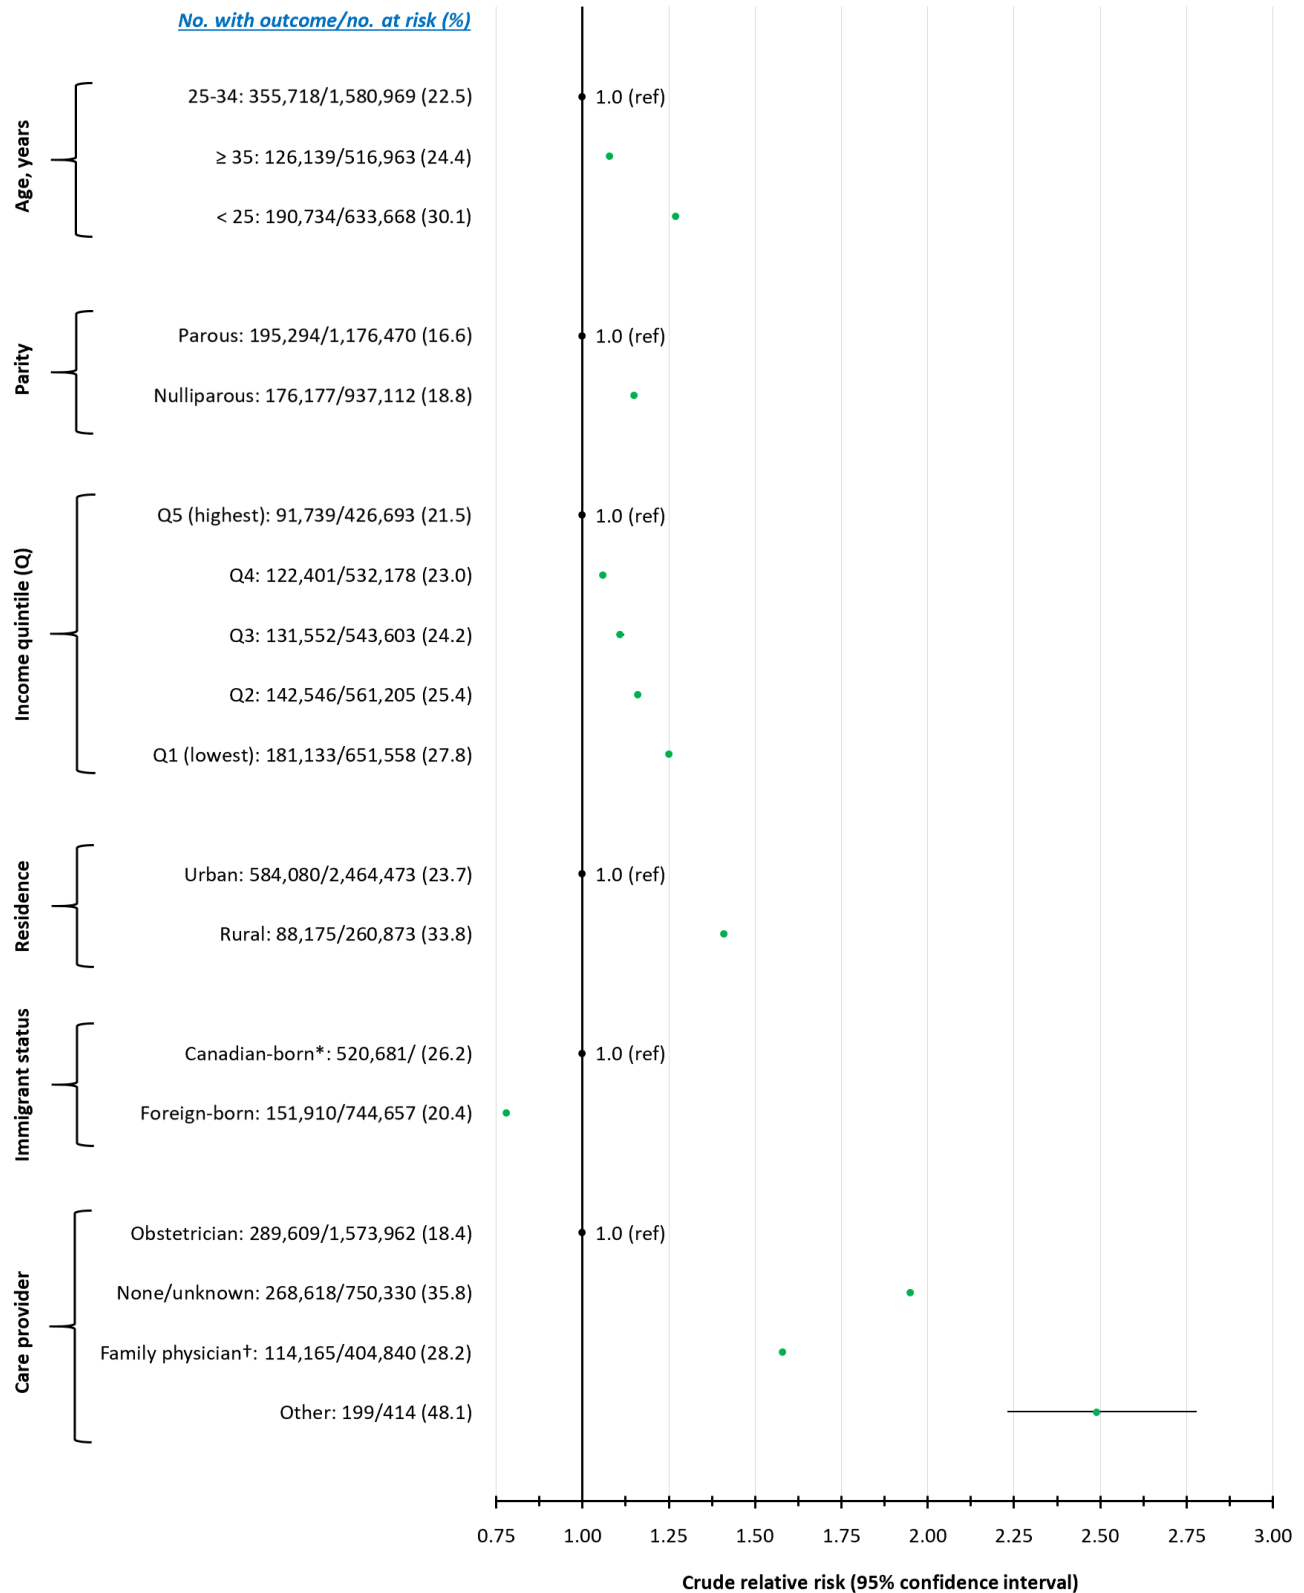

\* Includes long-term residents.

† Includes nurse practitioners.

Supplemental Figure S2. Crude relative risk (green dots) of an emergency department visit in the second trimester of pregnancy, associated with maternal age (< 25, 25-34 [ref], ≥ 35 years); parity (parous [ref] or nulliparous); income quintile (1, 2, 3, 4, or 5 [ref]); residence (urban [ref] or rural); immigrant status (Canadian-born\* [ref] or foreign-born); care provider (obstetrician [ref], family physician†, other, none/unknown).

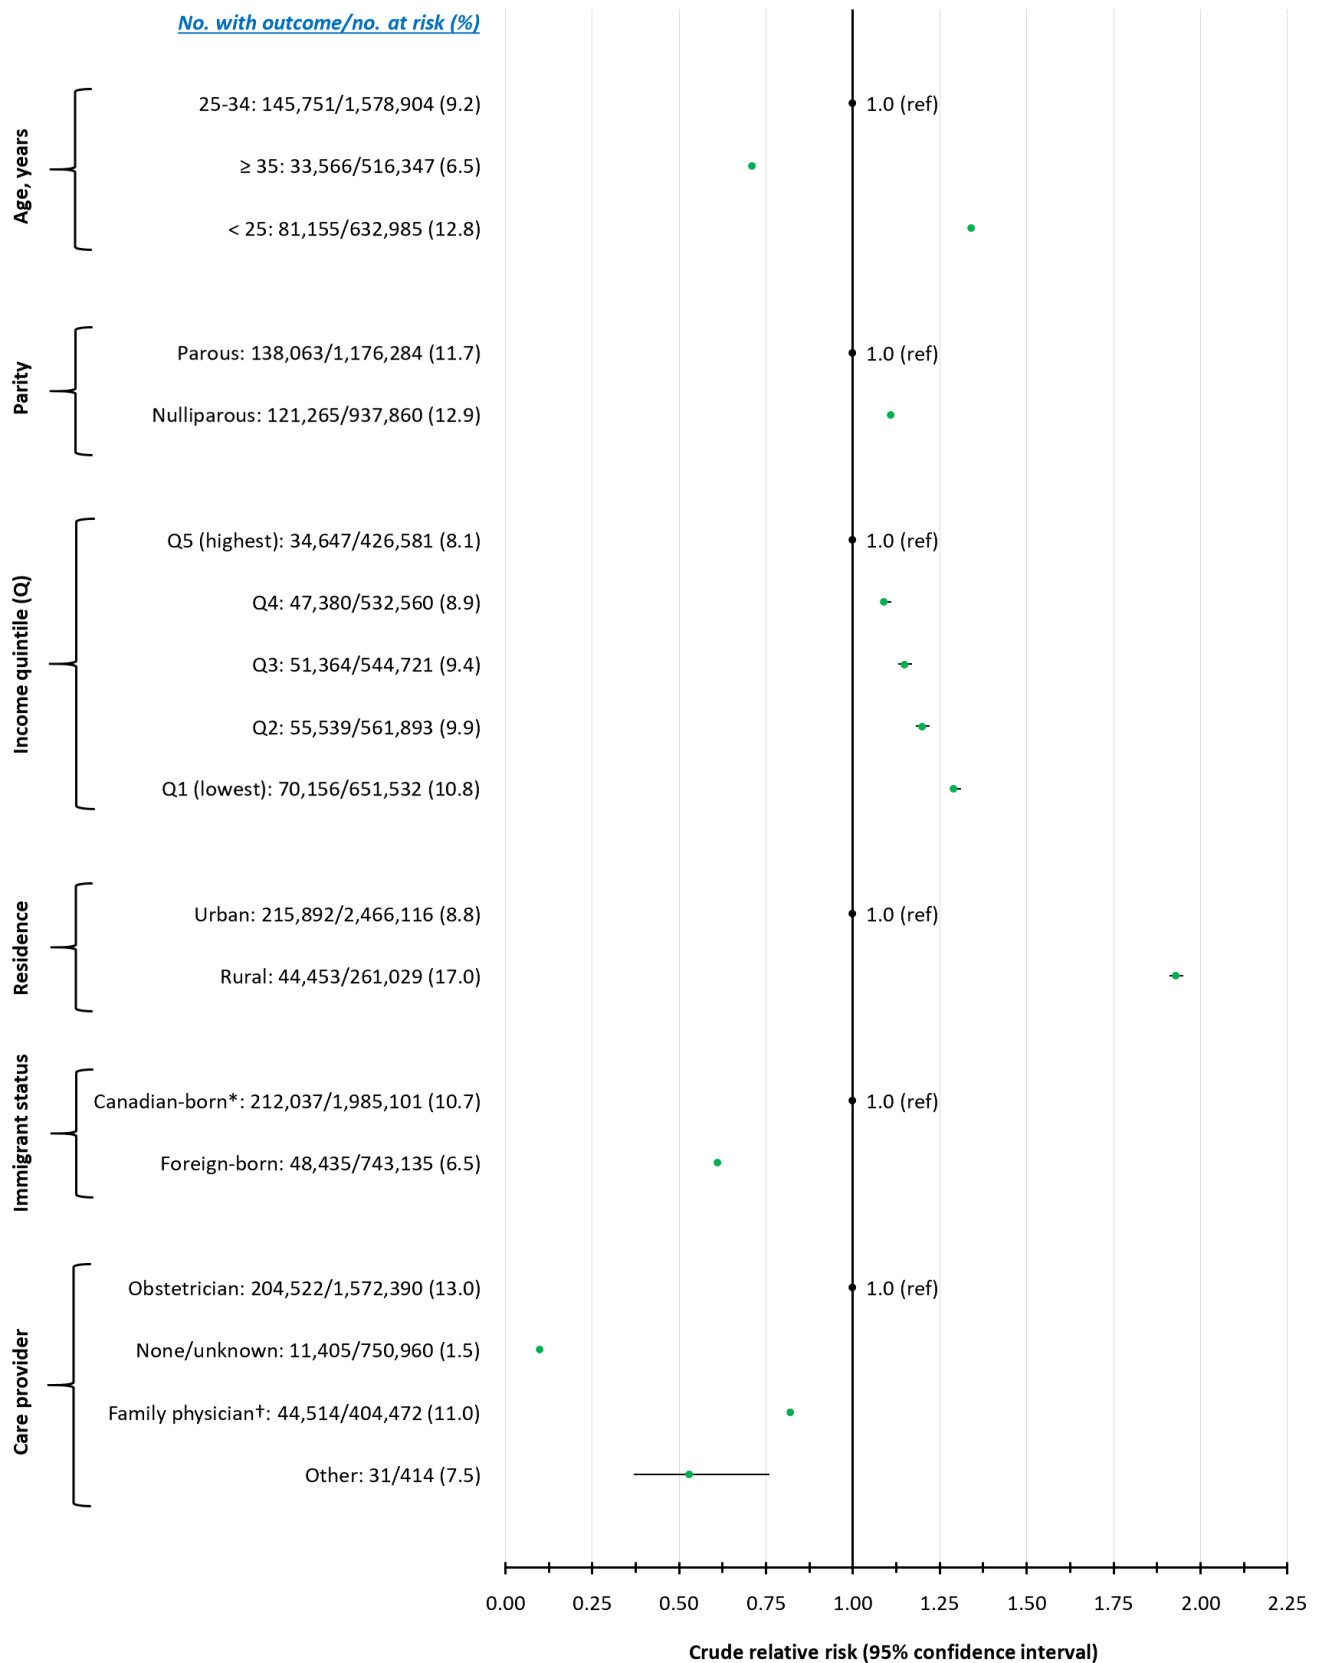

\* Includes long-term residents.

† Includes nurse practitioners.

Supplemental Figure S3. Crude relative risk (green dots) of an emergency department visit in the third trimester of pregnancy, associated with maternal age (< 25, 25-34 [ref], ≥ 35 years); parity (parous [ref] or nulliparous); income quintile (1, 2, 3, 4, or 5 [ref]); residence (urban [ref] or rural); immigrant status (Canadian-born\* [ref] or foreign-born); care provider (obstetrician [ref], family physician†, other, none/unknown).

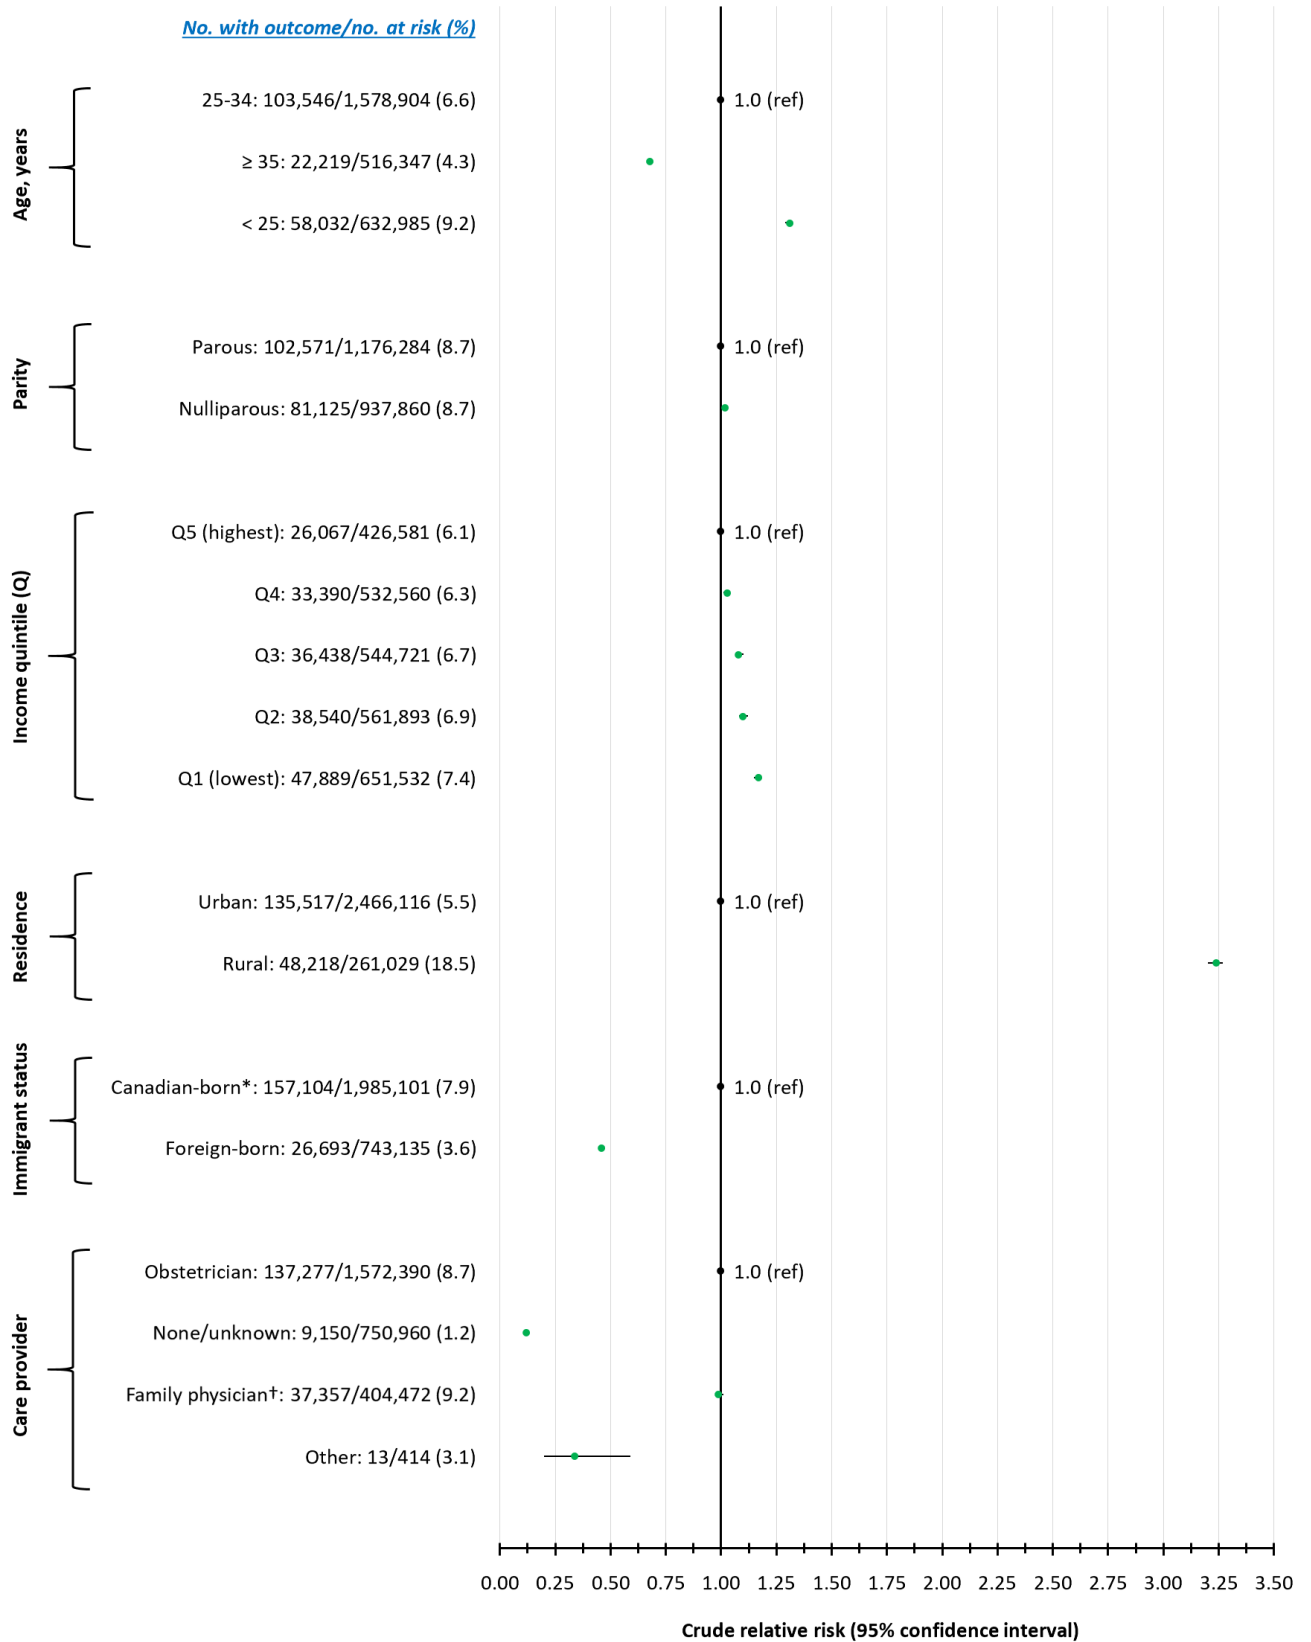

\* Includes long-term residents.

† Includes nurse practitioners.

Supplemental Figure S4. Crude relative risk (green dots) of an emergency department within 42 days after pregnancy outcome, associated with maternal age (< 25, 25-34 [ref], ≥ 35 years); parity (parous [ref] or nulliparous); income quintile (1, 2, 3, 4, or 5 [ref]); residence (urban [ref] or rural); immigrant status (Canadian-born\* [ref] or foreign-born); care provider (obstetrician [ref], family physician†, other, none/unknown).

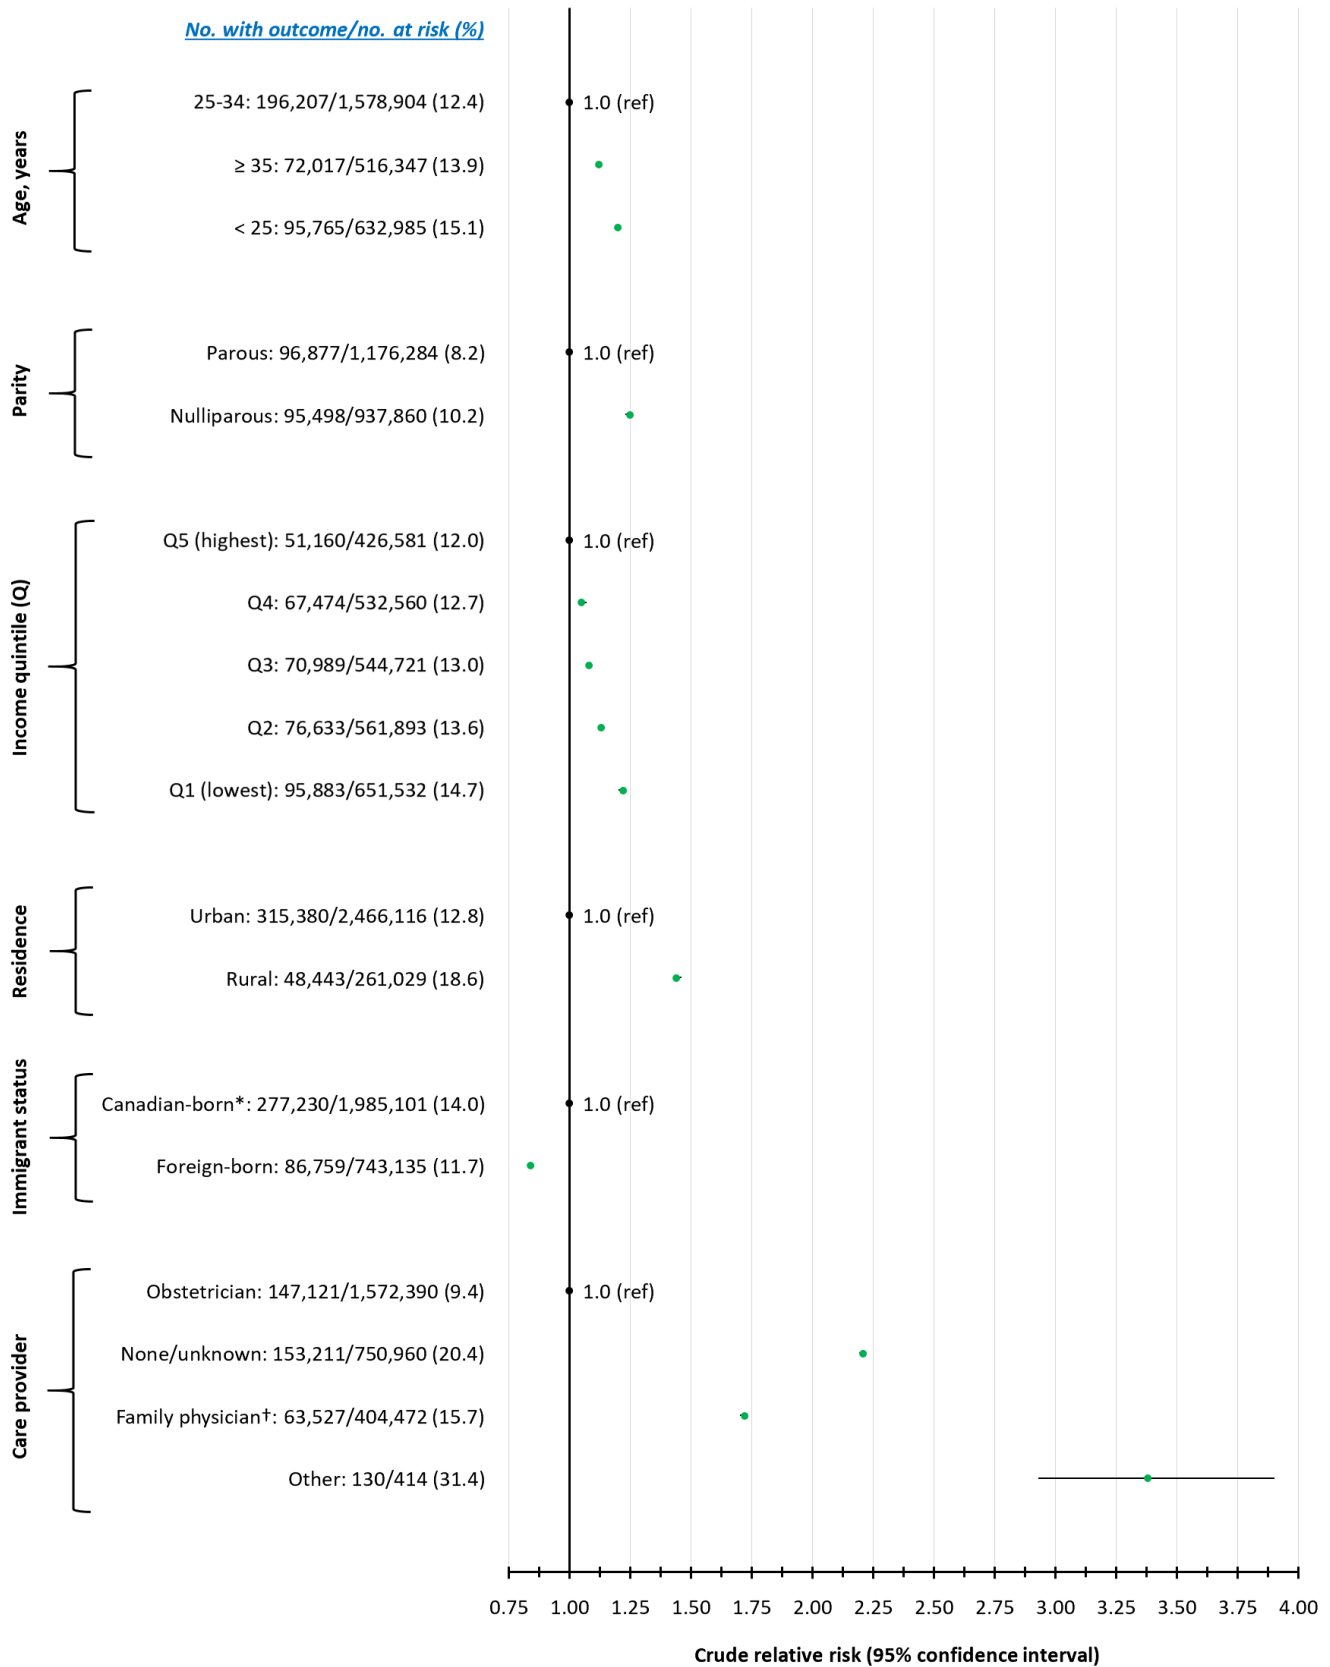

\* Includes long-term residents.

† Includes nurse practitioners.

Supplemental Figure S5. Crude relative risk (green dots) of an emergency department visit in pregnancy, or up to 42 days thereafter, for patients with a livebirth, associated with maternal age (< 25, 25-34 [ref], ≥ 35 years); parity (parous [ref] or nulliparous); income quintile (1, 2, 3, 4, or 5 [ref]); residence (urban [ref] or rural); immigrant status (Canadian-born\* [ref] or foreign-born); care provider (obstetrician [ref], family physician†, other, none/unknown).

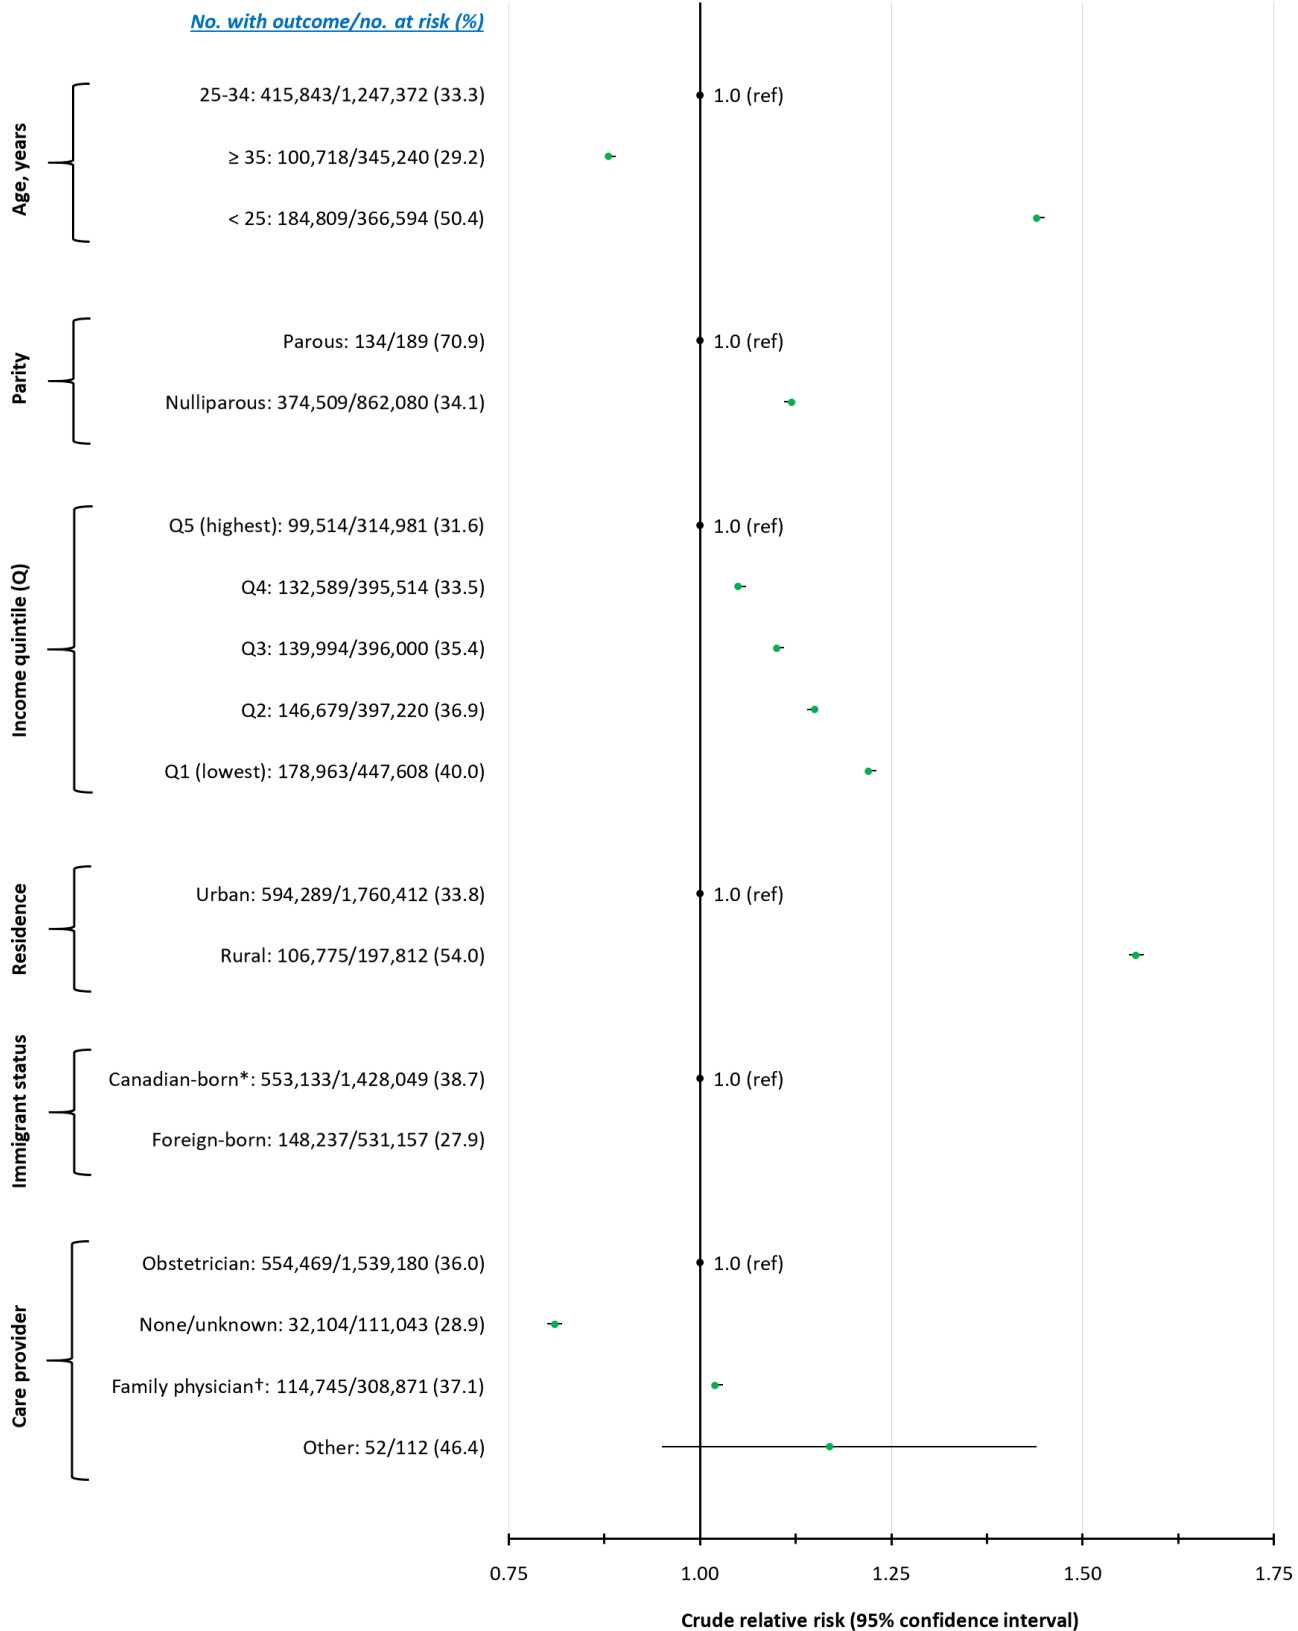

\* Includes long-term residents.

† Includes nurse practitioners.

Supplemental Figure S6. Crude relative risk (green dots) of an emergency department visit in pregnancy, or up to 42 days thereafter, for patients with a stillbirth, associated with maternal age (< 25, 25-34 [ref], ≥ 35 years); parity (parous [ref] or nulliparous); income quintile (1, 2, 3, 4, or 5 [ref]); residence (urban [ref] or rural); immigrant status (Canadian-born\* [ref] or foreign-born); care provider (obstetrician [ref], family physician†, other, none/unknown).

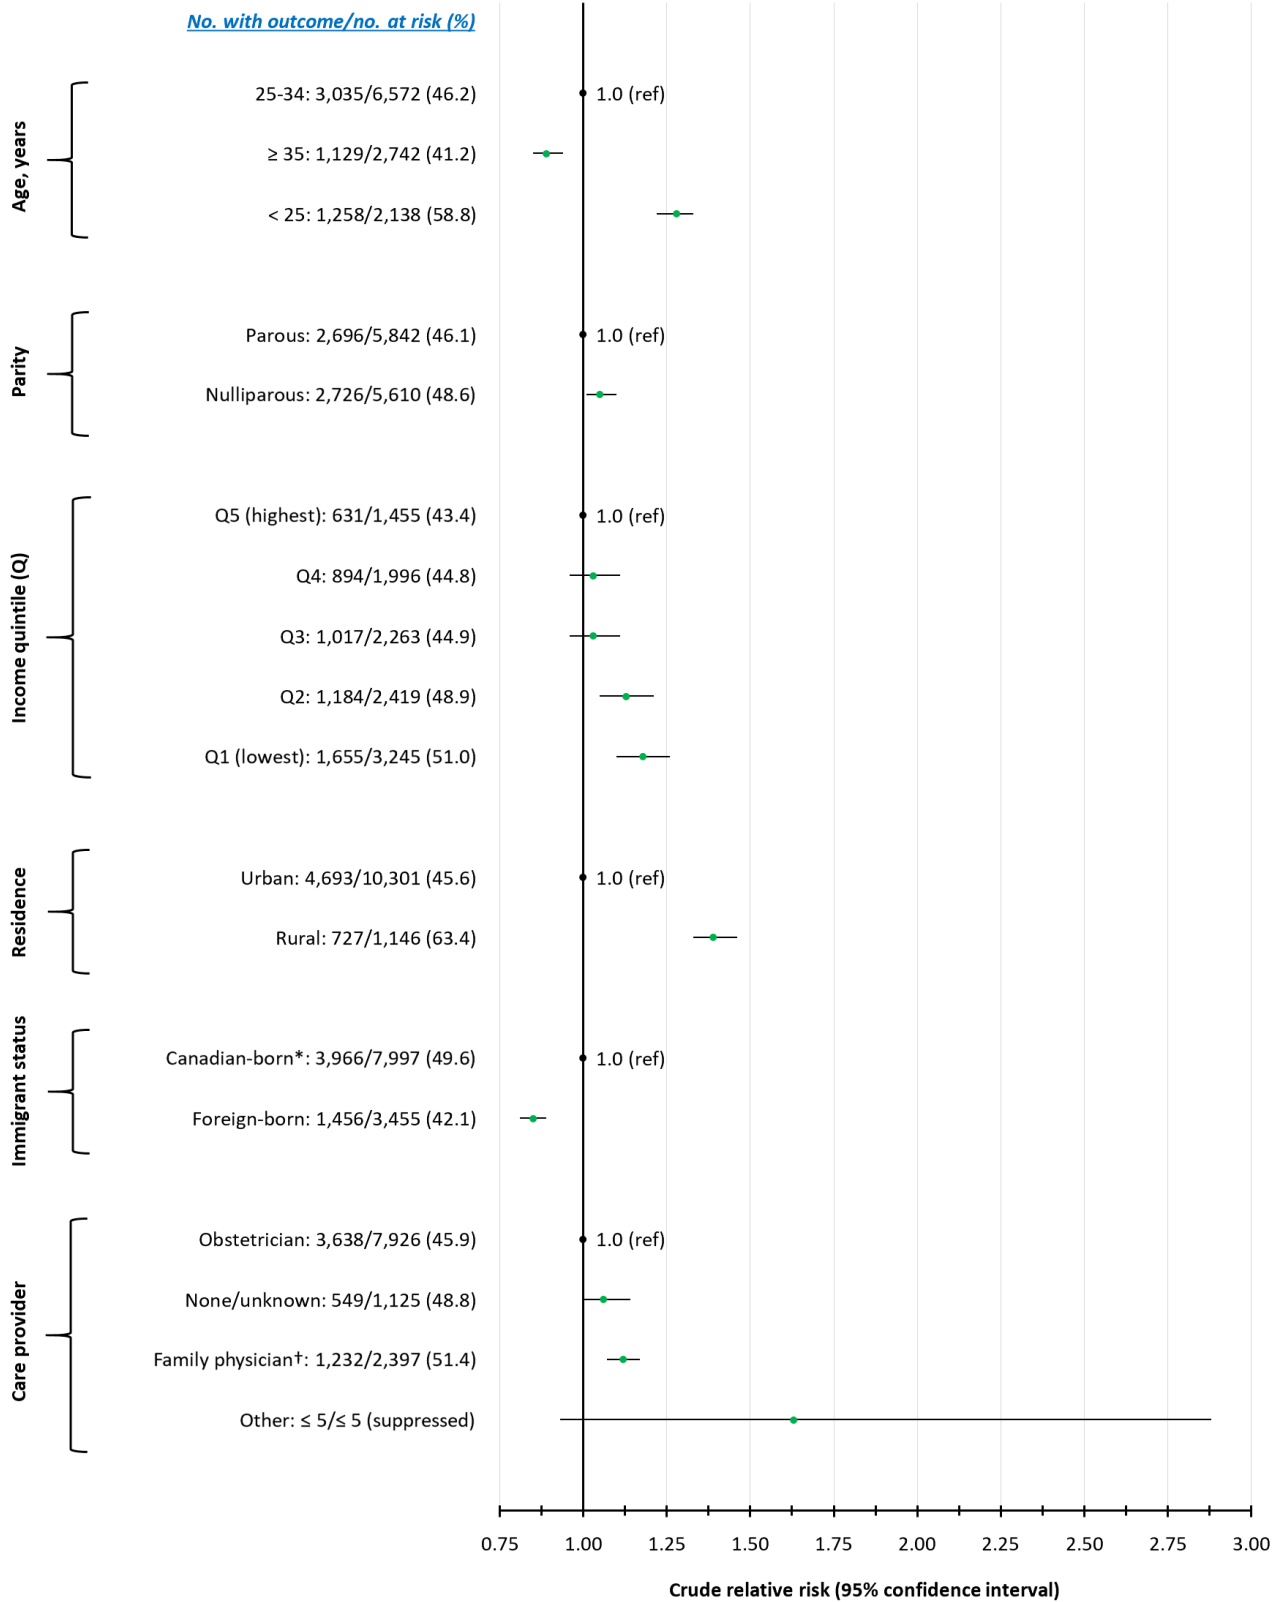

\* Includes long-term residents.

† Includes nurse practitioners.

Supplemental Figure S7. Crude relative risk (green dots) of an emergency department visit in pregnancy, or up to 42 days thereafter, for patients with a miscarriage, associated with maternal age (< 25, 25-34 [ref], ≥ 35 years); parity (parous [ref] or nulliparous); income quintile (1, 2, 3, 4, or 5 [ref]); residence (urban [ref] or rural); immigrant status (Canadian-born\* [ref] or foreign-born); care provider (obstetrician [ref], family physician†, other, none/unknown).

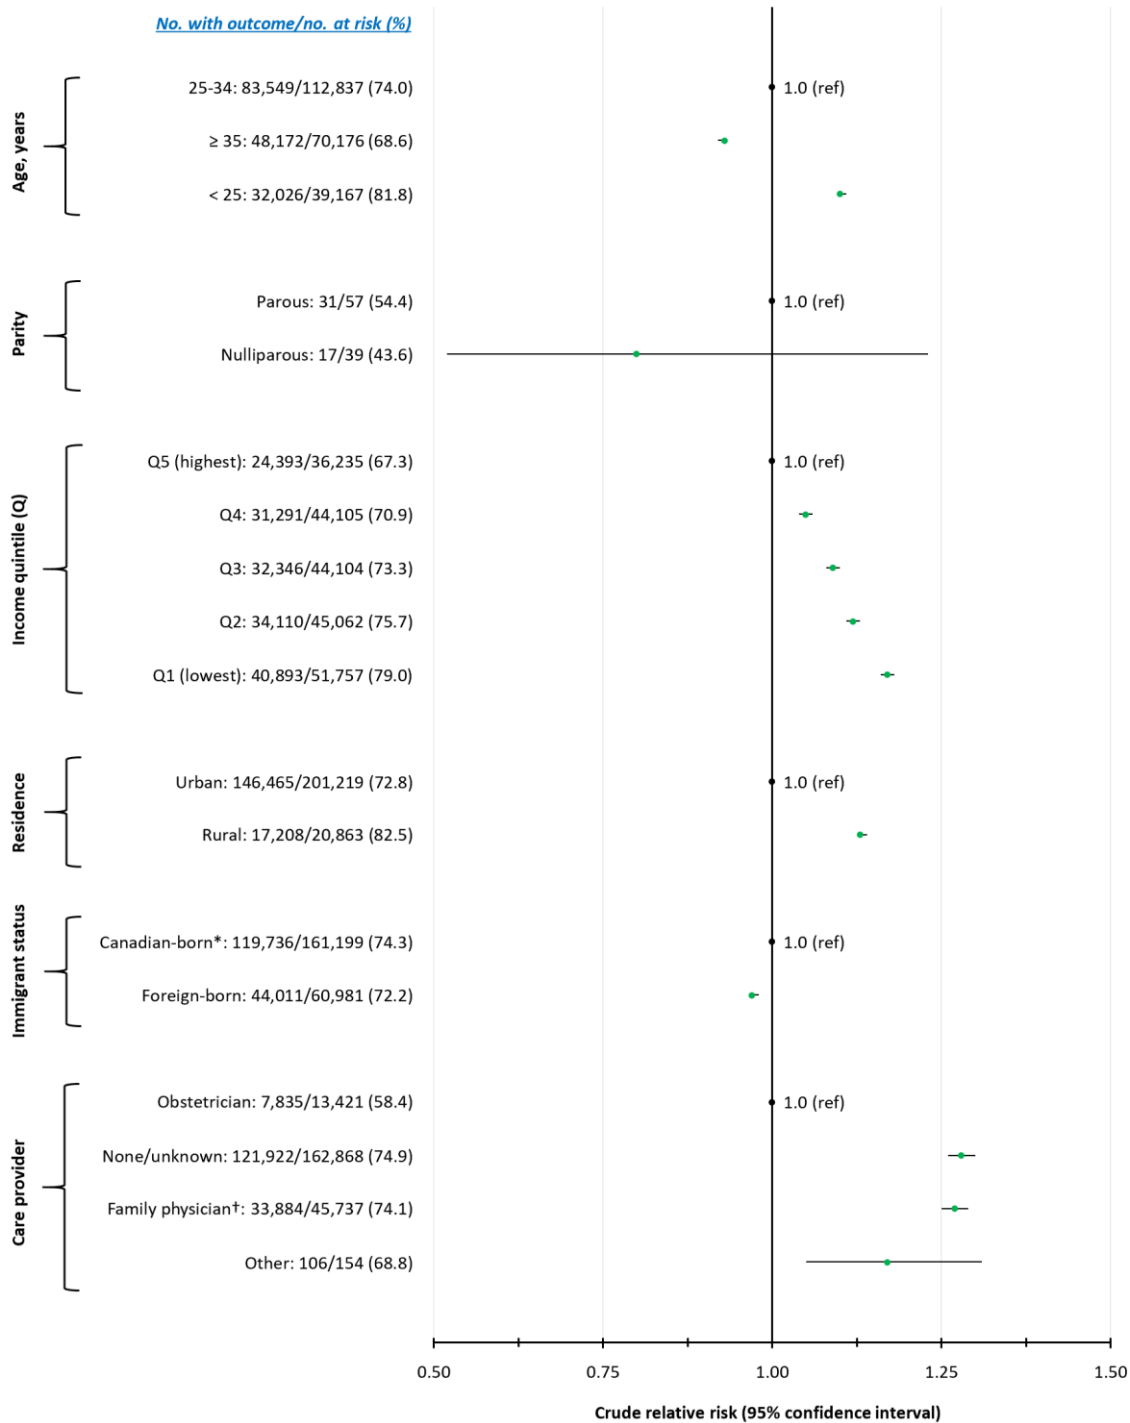

\* Includes long-term residents.

† Includes nurse practitioners.

Supplemental Figure S8. Crude relative risk (green dots) of an emergency department visit in pregnancy, or up to 42 days thereafter, for patients with an induced abortion, associated with maternal age (< 25, 25-34 [ref], ≥ 35 years); parity (parous [ref] or nulliparous); income quintile (1, 2, 3, 4, or 5 [ref]); residence (urban [ref] or rural); immigrant status (Canadian-born\* [ref] or foreign-born); care provider (obstetrician [ref], family physician†, other, none/unknown).

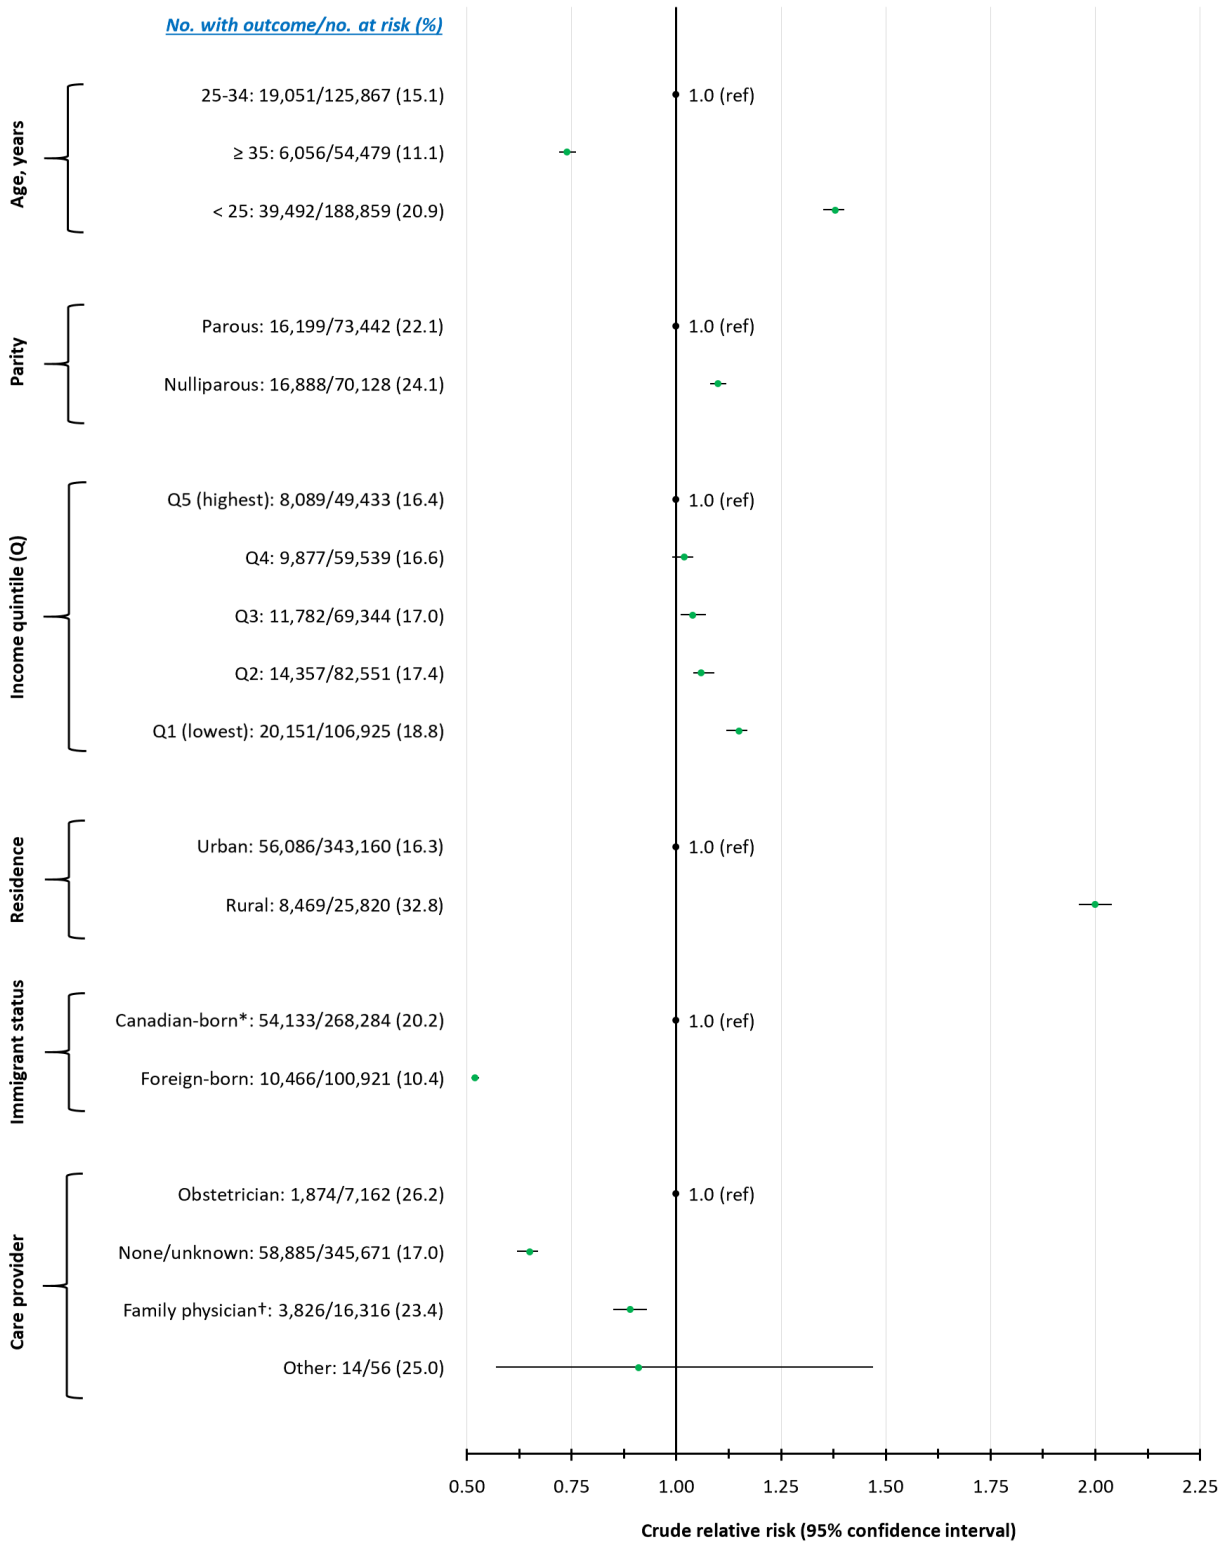

\*Includes long-term residents.

† Includes nurse practitioners.



Supplemental Figure S9. Crude relative risk (green dots) of an emergency department visit in pregnancy, or up to 42 days thereafter, for patients with a threatened abortion, associated with maternal age (< 25, 25-34 [ref], ≥ 35 years); parity (parous [ref] or nulliparous); income quintile (1, 2, 3, 4, or 5 [ref]); residence (urban [ref] or rural); immigrant status (Canadian-born\* [ref] or foreign-born); care provider (obstetrician [ref], family physician†, other, none/unknown).

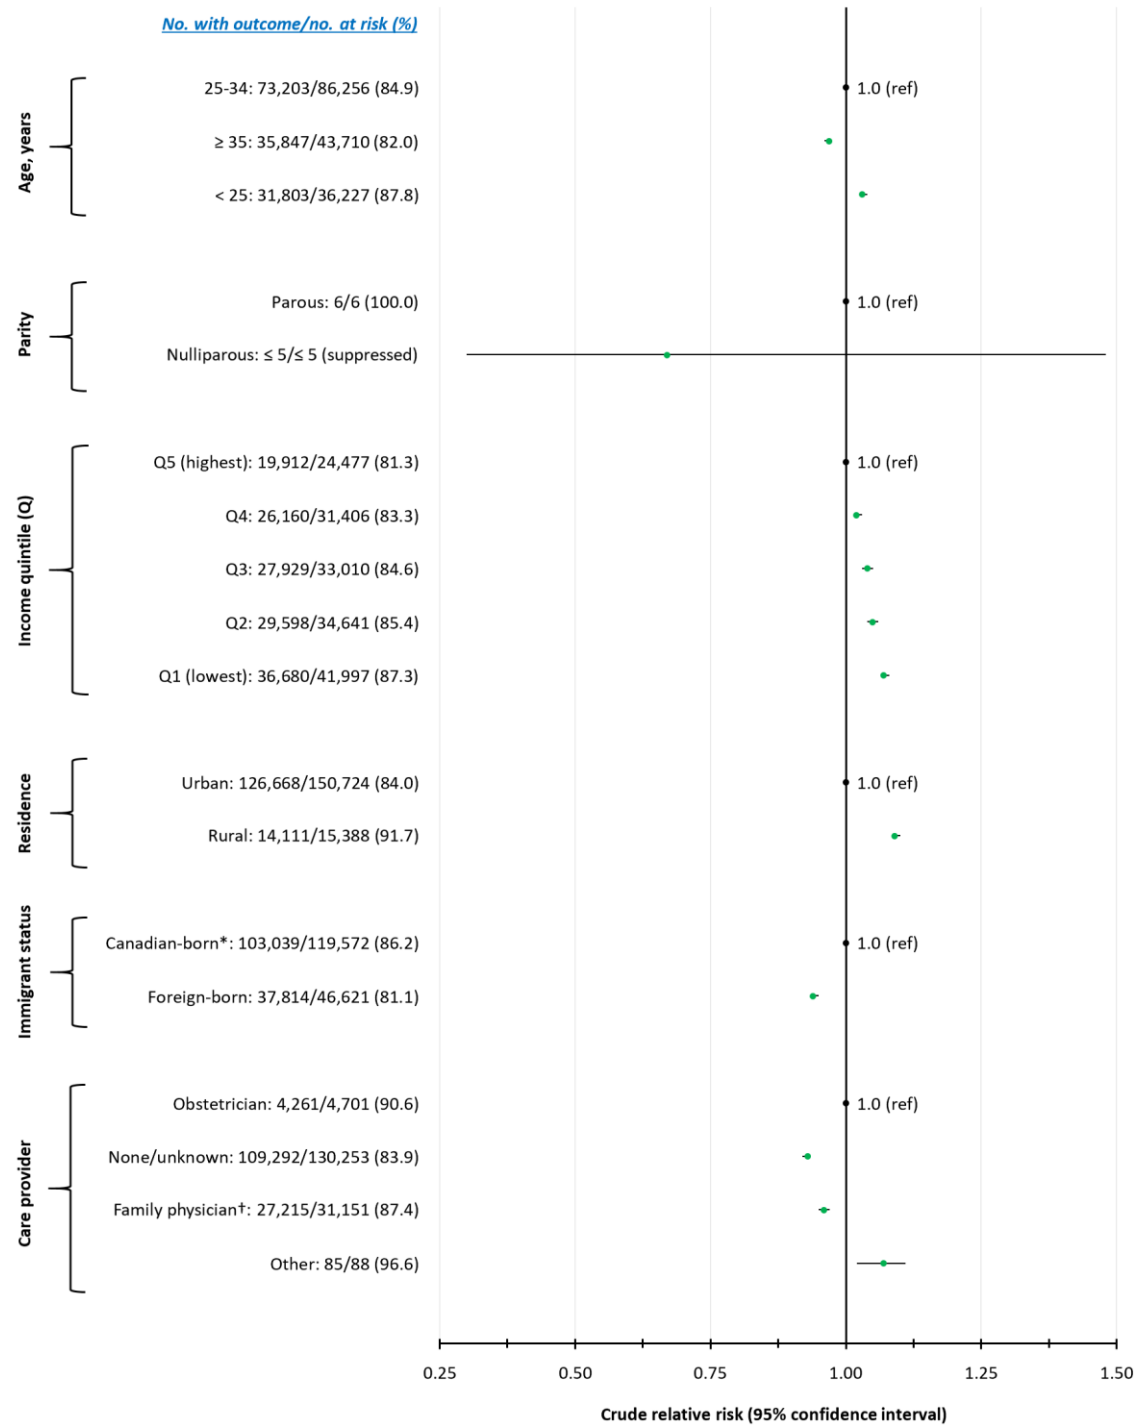

\* Includes long-term residents

† Includes nurse practitioners

Supplemental Figure S10. Proportion of all emergency department (ED) visits occurring in pregnancy, or up to 42 days postpartum, among livebirth deliveries

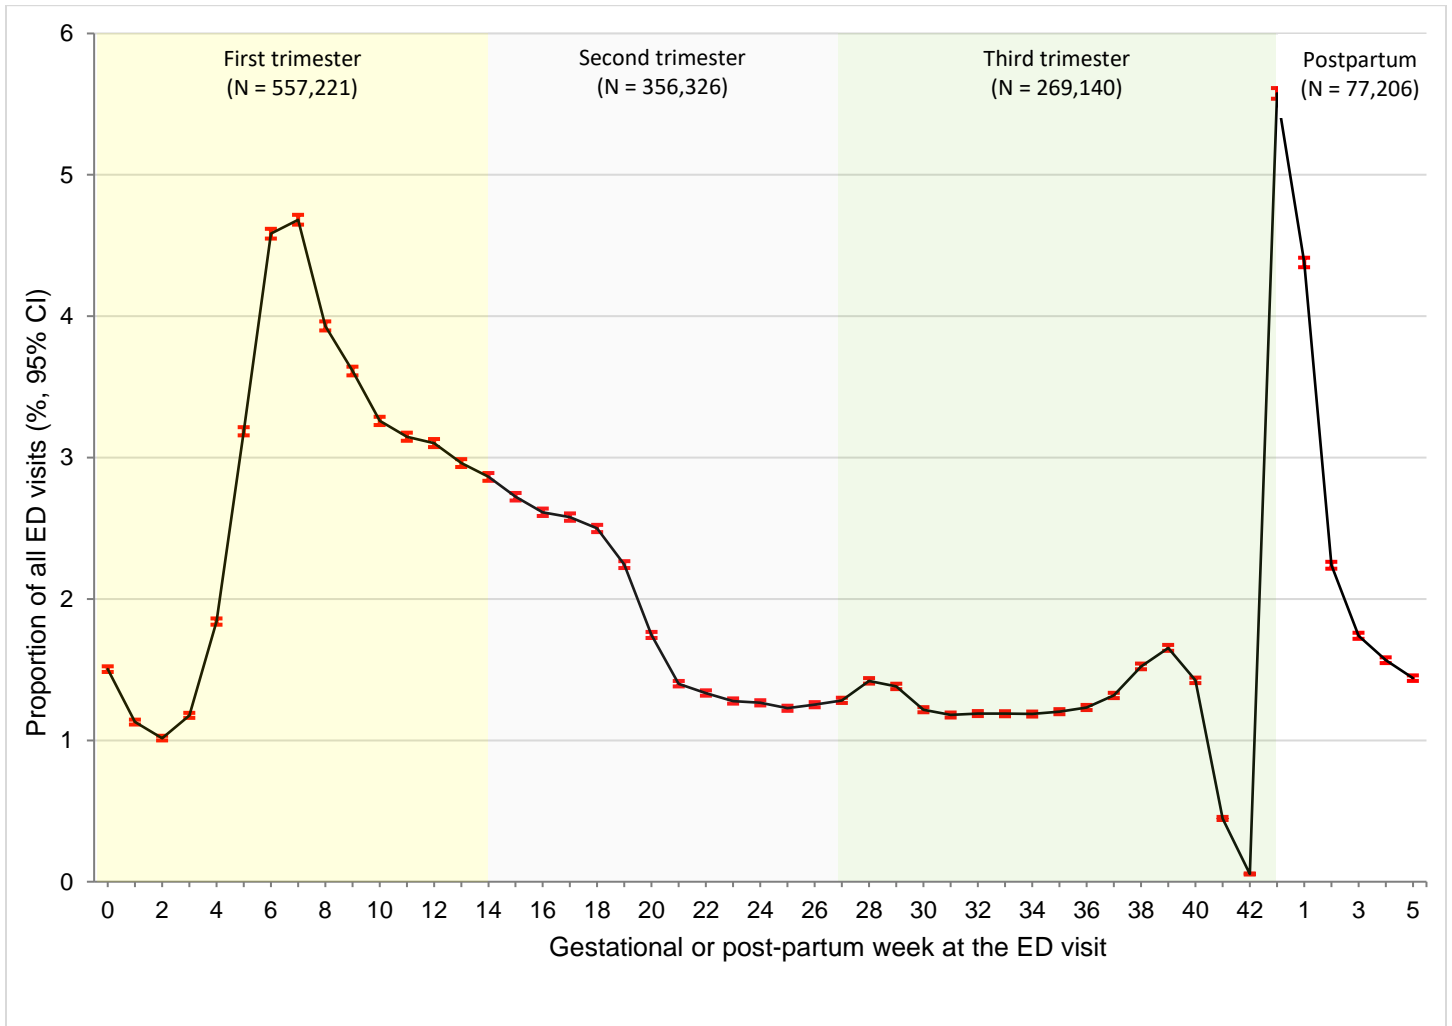

Supplement: 2019-0154-2-at.pdf [file 2019-0154-2-at.pdf]
